# Supplementary material for: Elucidating the Anti-Tumorigenic Efficacy of Oltipraz, a Dithiolethione, in Glioblastoma
Source: MDPI journal article supplement (doi:10.3390/cells11193057), 2022-09-29
Supplement: s1 [file s1]

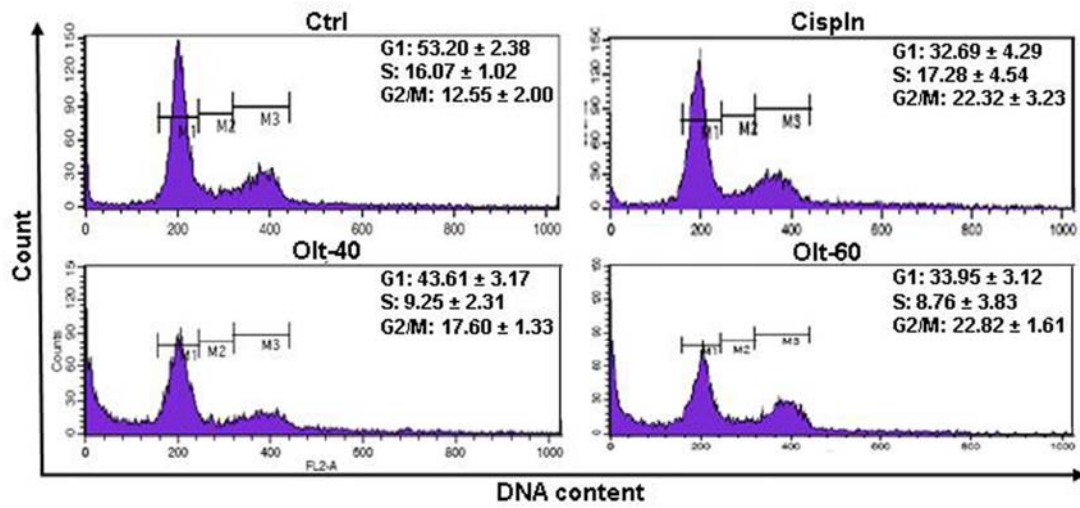

**Figure S1:** Representative image showing cell cycle pattern of U-87 MG cells following exposure of Cispln and Olt (40- and 60 $\mu$ M) for 48 h.

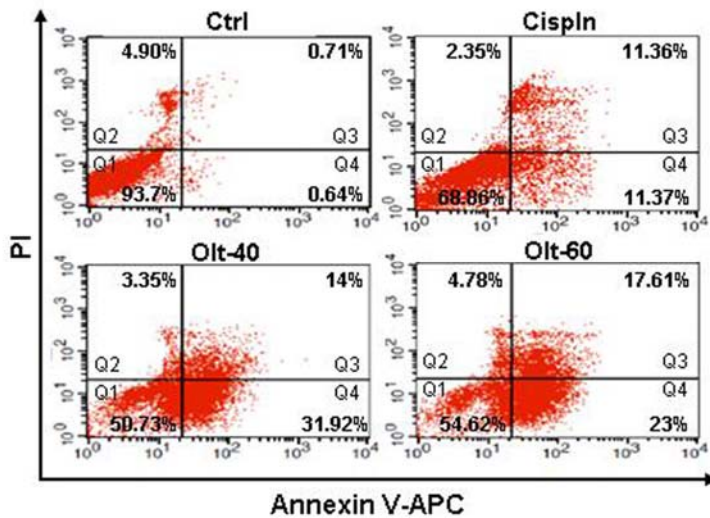

**Figure S2:** Representative image showing the annexin-PI pattern of U-87 MG cells following exposure of Cispln (30  $\mu$ M) and Olt (40- and 60 $\mu$ M) for 48 h.

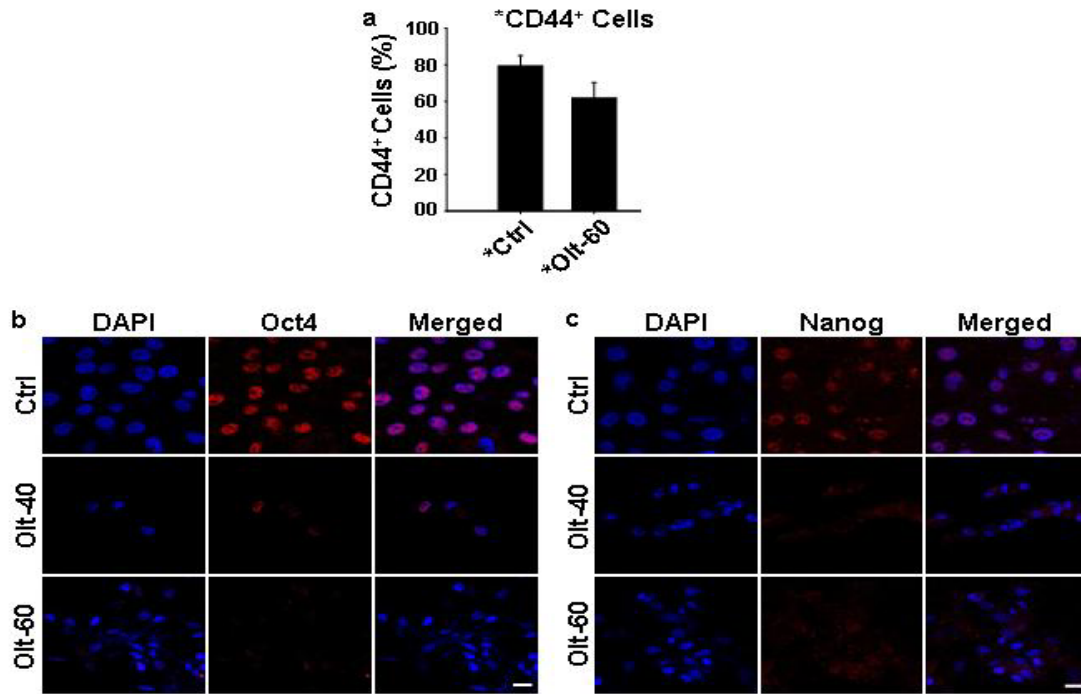

**Figure S3:** (a). Decrease in CD44<sup>+</sup> population in post-sorted CD44<sup>+</sup> cells (\*CD44<sup>+</sup>) exposed to Olt-60μM for 48 h. \* $p \leq 0.05$ , compared to the untreated \*CD44<sup>+</sup> Ctrl group. Data are presented as mean  $\pm$  SEM (n=4). (b,c). Immunostaining for detection Oct4 (b) and Nanog (c) in U-87 MG cells after treatment of Olt for 48 h suggested a decrease in expression of stem cell markers in response to Olt exposure.

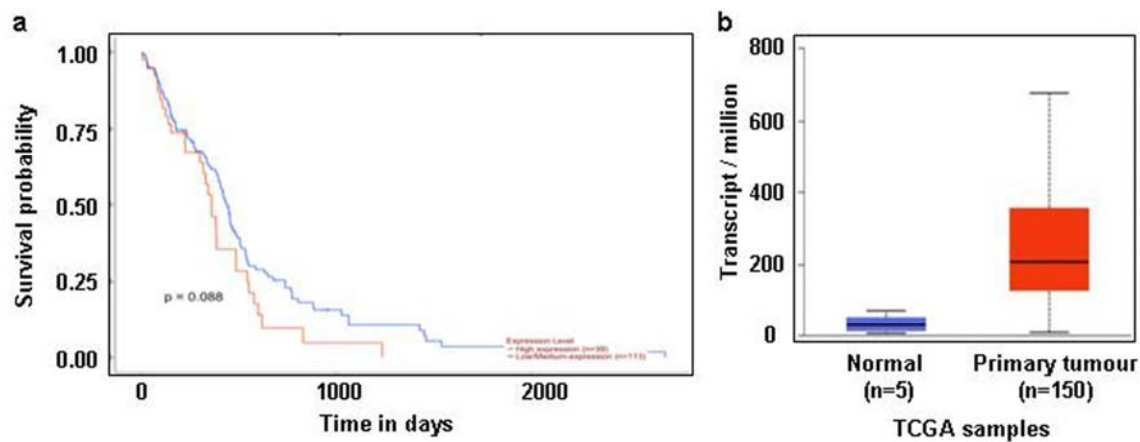

**Figure S4:** (a) *In silico* analysis with the data from The Cancer Genome Atlas (TCGA) for the relative CD44 expression in normal (n=5) and primary tumor (n=156) samples using the ULCAN web. (b) The survival rates of patients with GBM having low (blue) or high (red) CD44 expression, as estimated by the Kaplan-Meier method.
